# Supplementary material
Source: PubMed Central journal article supplement (PMC8720468)
Supplement: NIHMS1746531-supplement-1.pdf [file NIHMS1746531-supplement-1.pdf]

Supplementary Materials for

**Multiomic Analysis Reveals Decidual-specific Transcriptional Programing of MAIT cells**

Jessica Vazquez<sup>†</sup>, Melina Chavarria<sup>†</sup>, Deborah Chasman, Rene Welch Schwartz, Chanel T. Tyler, Gladys Lopez, Rachel C. Fisher, Irene M. Ong\*, Aleksandar K. Stanic\*

Department of Obstetrics and Gynecology, University of Wisconsin-Madison, Madison, WI  
<sup>†</sup>JV and MC should be considered joint first author. IMO and AKS should be considered equal senior/corresponding authors.

\*Correspondence to: A.K. Stanic, Department of Obstetrics and Gynecology, University of Wisconsin-Madison, Perinatal Research, Meriter-park, 202 S. Park Street, Madison, WI 53715, USA

E-mail: [stanickostic@wisc.edu](mailto:stanickostic@wisc.edu) (A.K. Stanic)

\*Correspondence to: I.M. Ong, Department of Obstetrics and Gynecology, University of Wisconsin-Madison, Perinatal Research, Meriter-park, 202 S. Park Street, Madison, WI 53715, USA

E-mail: [irene.ong@wisc.edu](mailto:irene.ong@wisc.edu) (I.M. Ong)

Key Words: MAIT cells, Decidua Basalis, Decidua Parietalis, MR1, scRNA-seq, CITE-seq

This file includes:

**Figure S1 Identification of MAIT cells in PBMCs.** (A) Representative gating scheme showing the identification of CD3<sup>+</sup> T cells. (B) Identification of MAIT cells in PBMCs.

**Figure S2 Tetramer labeling of decidual MAIT cells.** (A) Tetramer specific (5-OP<sup>+</sup>) identification of MAIT cells in the Decidua Basalis (top) and Decidua Parietalis (bottom). Non-specific tetramer (6-FP) shows no binding of presumptive MAIT cells. Plots are representative of two independent experiments. (B) 5-OP tetramer labeling of PBMC MAIT cells with little binding of unspecific tetramer binding.

**Figure S3 Sorting gating scheme for CD3<sup>+</sup> T cells.** Representative plots showing the gating scheme used to sort CD3<sup>+</sup> T cells. Subsequent plot showing > 95% purity of sorted populations.

**Figure S4 Transcription factor expression in MAIT cells.** (A) Transcription factor expression in CD4<sup>+</sup>, CD8<sup>+</sup>, and MAIT cells from PBMCs. Fluorescence minus one (FMO) control is shown with dotted line. (B) Transcription factor expression comparisons in MAIT cells isolated from decidua basalis, decidua parietalis, and PBMCs. Decidua Basalis, n = 14; Decidua Parietalis, n = 14; PBMCs, n = 9. Data represented as max/min, median, and 25 and 75<sup>th</sup> percentiles. Statistical significance was determined by One-way ANOVA, followed by Tukey post-hoc tests, were appropriate. \*p < 0.05, \*\*p < 0.005.

**Figure S5 Expression of selected markers unique to decidual MAIT cells.** Expression of selected genes in MAIT cells from decidua basalis and PBMCs.

**Figure S6 MR1 expression by decidual antigen presenting cells (APCs) in term human decidua.** (A) Gating scheme for decidual APCs. (B) MR1 expression on various APCs from human decidua basalis.

**Table S1 Phenotypes of MR1-expression Antigen Presenting Cells (APCs).**

Figure S1

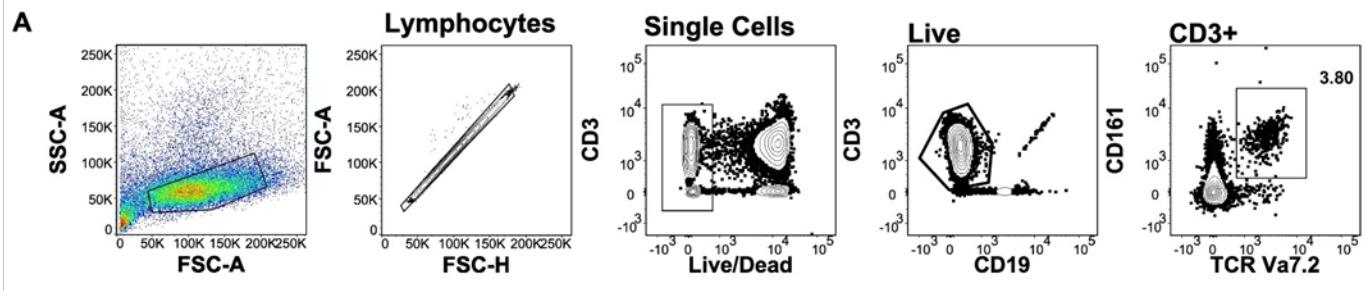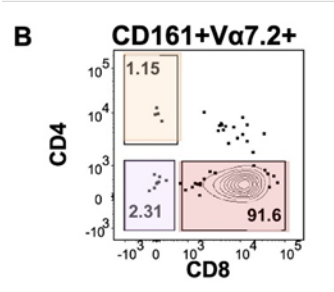

Figure S2

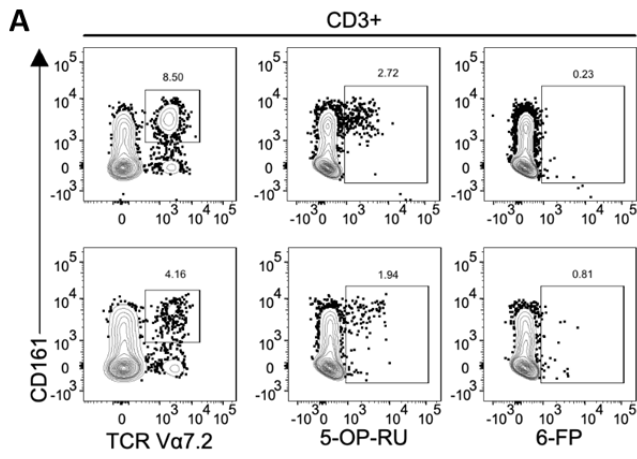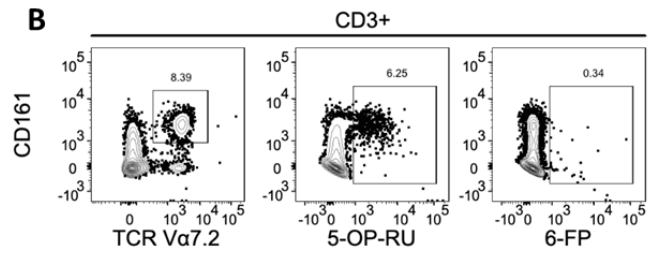

**Figure S3**

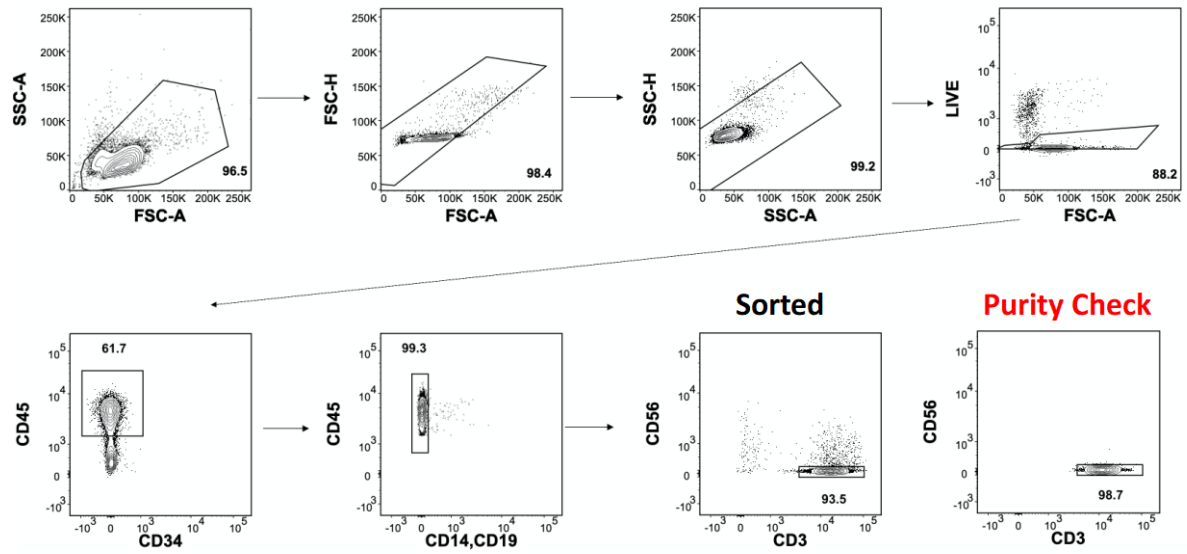

Figure S4

A

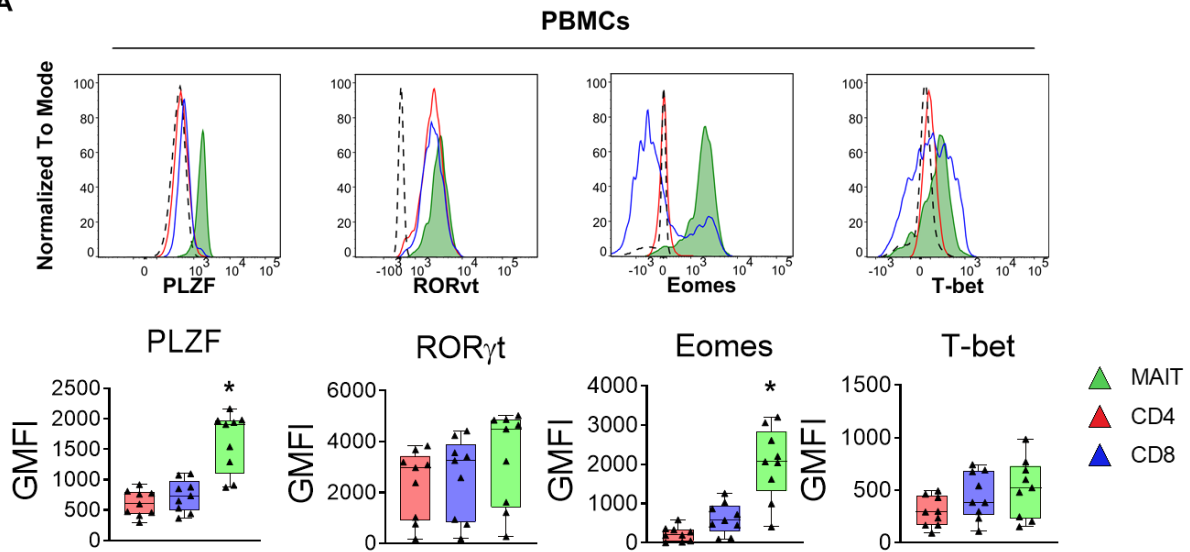

B

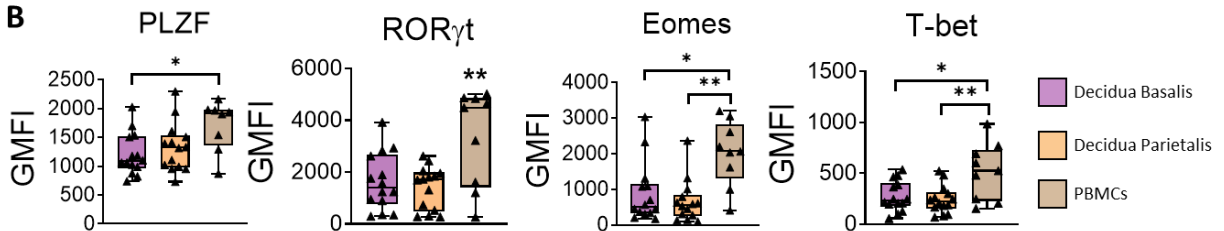

Figure S5

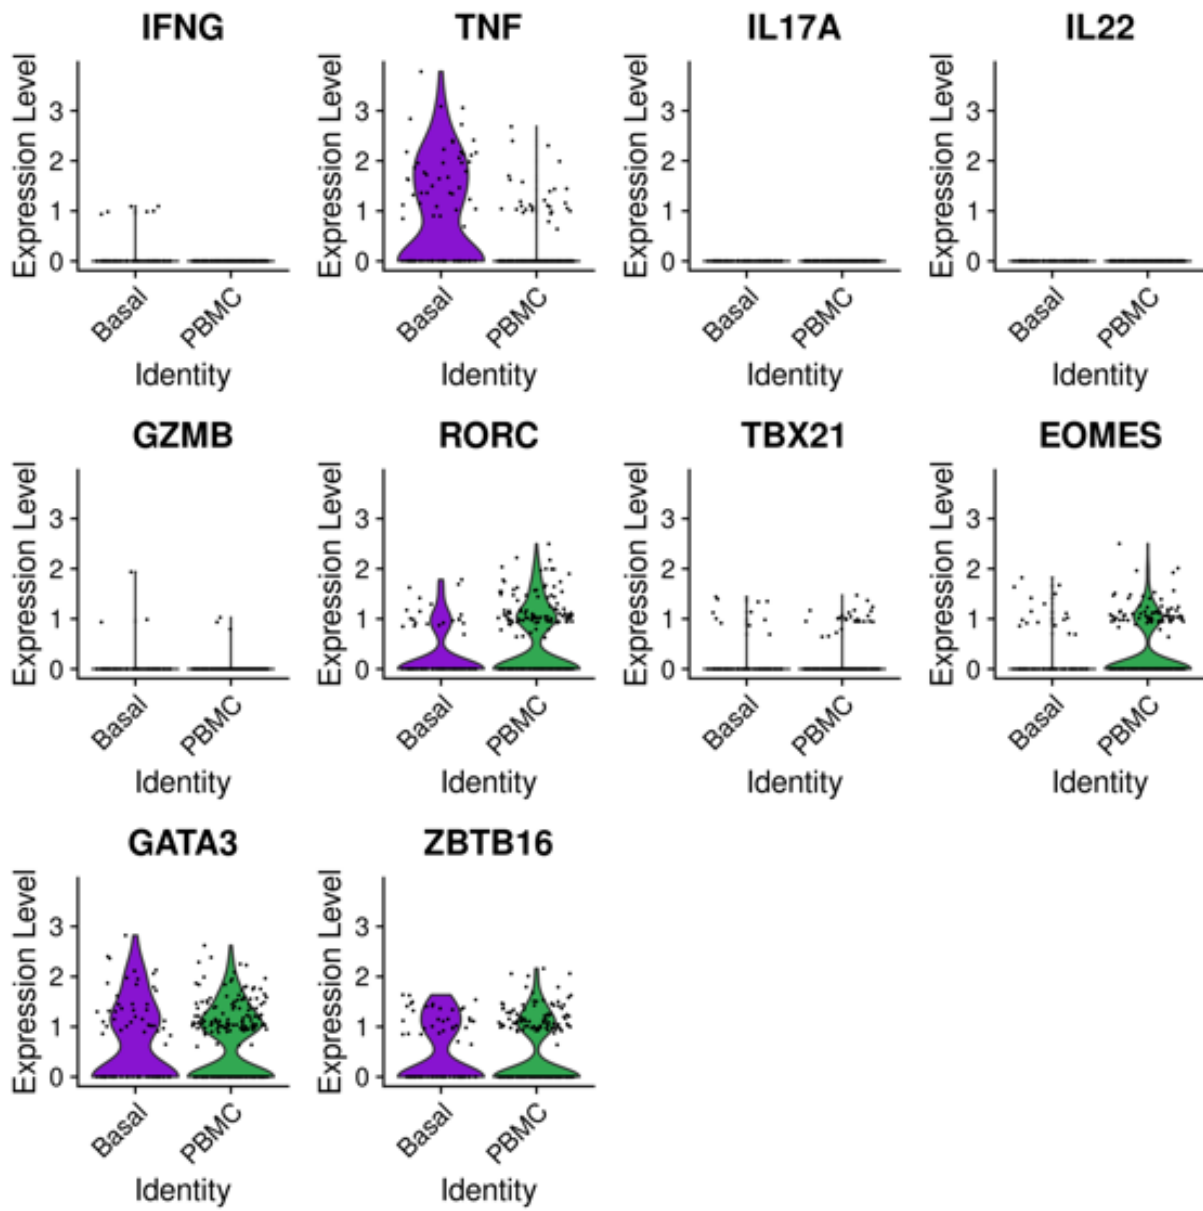

Figure S6

**A**

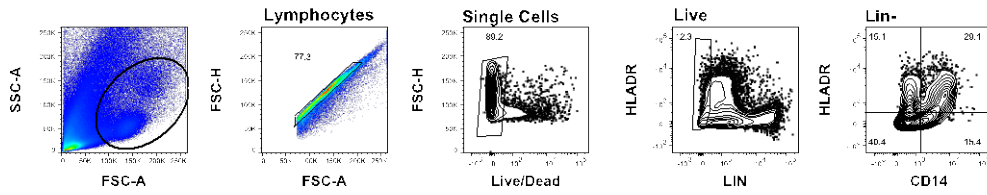

**B**

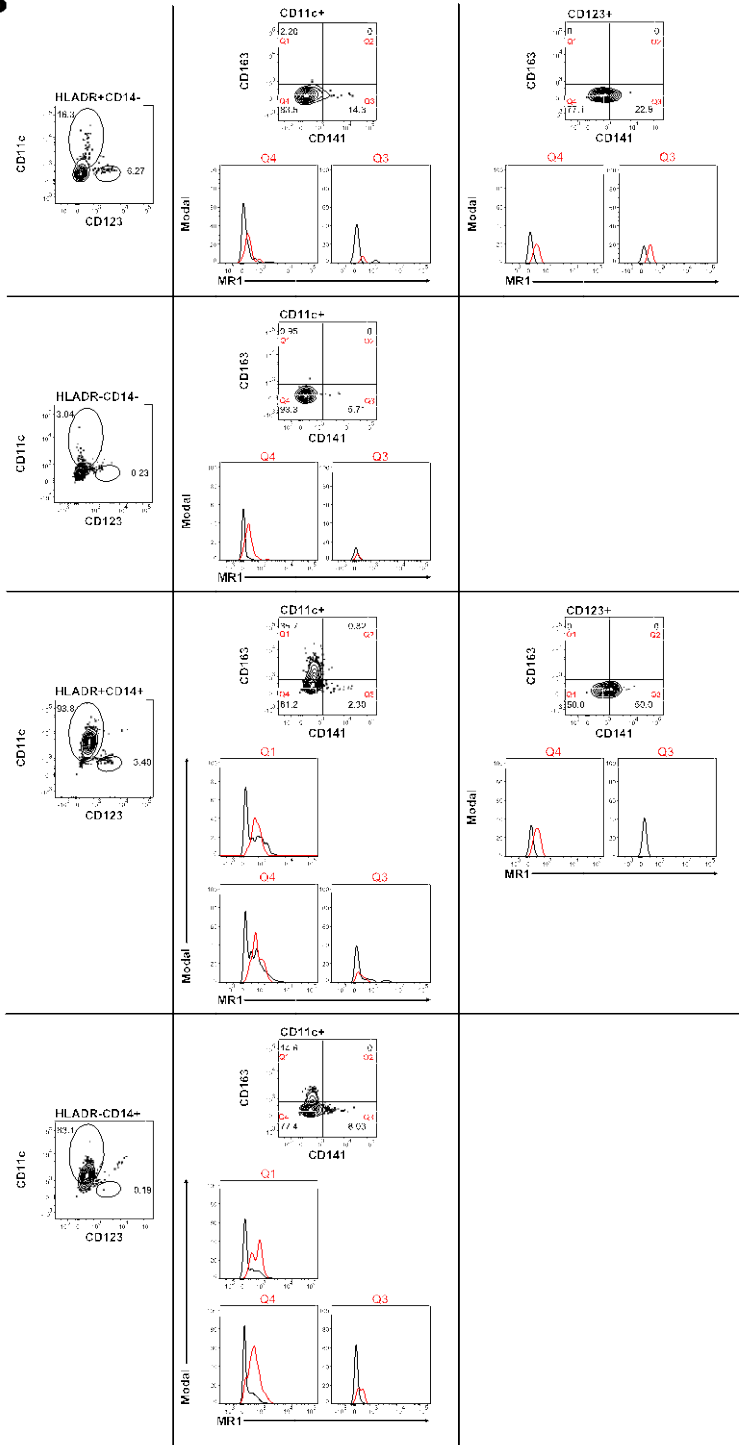



**Table S1**

| <b>Subset</b>                 | <b>Phenotype</b>               |
|-------------------------------|--------------------------------|
| Classical type 1 DCs or cDC1s | HLADR+CD14-CD11c+CDC141+CD163- |
| Classical type 2 DCs or cDC2s | HLADR+CD14-CD11c+CDC141-CD163- |
| pre-cDC1                      | HLADR+CD14-CD123+CDC141+CD163- |
| Early pre-DCs                 | HLADR+CD14-CD123+CDC141-CD163- |
| PMN-MDSCs                     | HLADR-CD14-CD11c+CDC141+CD163- |
| PMN-MDSCs                     | HLADR-CD14-CD11c+CDC141-CD163- |
| Classical monocyte            | HLADR+CD14+CD11c+CDC141-CD163+ |
| Monocyte-derived DCs          | HLADR+CD14+CD11c+CDC141+CD163- |
| Inflammatory DCs              | HLADR+CD14+CD11c+CDC141-CD163- |
| DC-10                         | HLADR+CD14+CD123+CDC141+CD163- |
| Common DC progenitor          | HLADR+CD14+CD123+CDC141-CD163- |
| Classical monocyte            | HLADR-CD14+CD11c+CDC141-CD163+ |
| Suppressive Monocytes         | HLADR-CD14+CD11c+CDC141+CD163- |
| Mo-MDSCs                      | HLADR-CD14+CD11c+CDC141-CD163- |
